# Supplementary material for: Effects of weathering and simulated gastric fluid exposure on cellular responses to polystyrene particles
Source: Royal Society of Chemistry journal article supplement (doi:10.1039/d4en00444b), 2024-10-11
Supplement: d4en00444b1.pdf [file d4en00444b1.pdf]

## Supporting Information

### Effects of Weathering and Simulated Gastric Fluid Exposure on Cellular Responses to Polystyrene Particles

Liyuan Gong<sup>1</sup>, Animesh Pan<sup>2</sup>, Takeshi Matsuo<sup>3</sup>, Hemalatha Kanniyappan<sup>4</sup>, Irene Andreu<sup>2</sup>, Alan Rothman<sup>5</sup>, Geoffrey D. Bothun<sup>2</sup>, Mathew Mathew<sup>4</sup>, and Yang Lin<sup>\*a 1</sup>

<sup>1</sup>Department of Mechanical, Industrial and Systems Engineering, University of Rhode Island, Kingston, RI, 02881, USA

<sup>2</sup>Department of Chemical Engineering, University of Rhode Island, Kingston, RI, 02881, USA

<sup>4</sup>Department of Mechanical and Systems Engineering, Okayama University, Okayama, 700-8530, Japan

<sup>3</sup>Department of Department of Biomedical Sciences, University of Illinois Chicago, Chicago, IL, 60607, USA

<sup>5</sup>Department of Cell and Molecular Biology, University of Rhode Island, Kingston, RI, 02881, USA

#### Summary

Number of pages: 10

Number of Figures: 7

Number of Tables: 6

## Contents

**Fig S1.** Accelerated weathering setup in the UV chamber. (a). Q-Lab UV weathering chamber (b) glass beakers in the chamber. (c) closeup look at the beakers containing particles. (d). UVA340nm irradiance distribution.

**Fig S2.** A. Raman spectrum of non-treated particles and SGF-treated particles. (a) Full Raman spectrum, (b) Spectrum for wavenumber range 800 – 2000  $\text{cm}^{-1}$ , (c) spectrum for wavenumber range 2700- 3500  $\text{cm}^{-1}$ ; (d). FTIR spectrum for range 3000  $\text{cm}^{-1}$  – 3500  $\text{cm}^{-1}$ .

**Fig. S3.** EDS images showing nitrogen and oxygen atomic % and distribution on particle surfaces

**Fig. S4.** XPS survey for all particles. (a) non-treated pristine particles, (b) non-treated DI water weathered particles, (c) non-treated seawater weathered particles, (d) SGF-treated pristine particles, (e) SGF-treated DI water weathered particles, (f) SGF-treated seawater weathered particles.

**Fig S5.** ROS production of RAW264.7 cells.

**Fig. S6.** TNF $\alpha$  standard curve

**Fig. S7.** Particles in Caco-2 cells Z-stack 3D images.

**Table S1.** XPS survey element composition of non-treated pristine polystyrene particles

**Table S2.** XPS survey element composition of non-treated DI water weathered pristine polystyrene particles

**Table S3.** XPS survey element composition of non-treated seawater-weathered polystyrene particles

**Table S4.** XPS survey element composition of SGF-treated pristine polystyrene particles

**Table S5.** XPS survey element composition of SGF-treated DI water-weathered polystyrene particles

**Table S6.** XPS survey element composition of SGF-treated seawater-weathered polystyrene particles

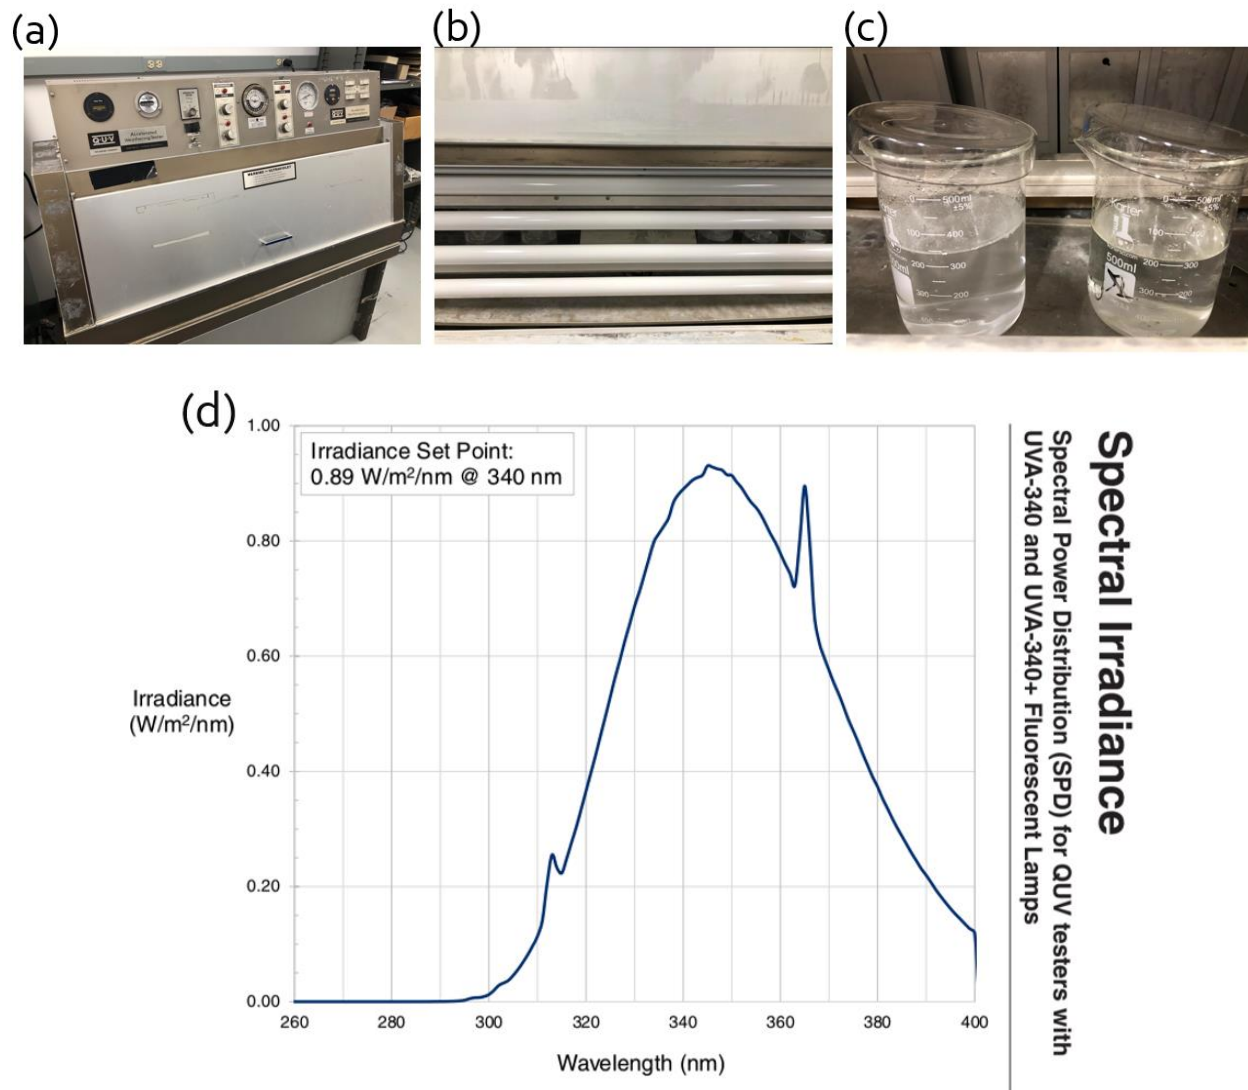

**Fig. S1.** Accelerated weathering setup in the UV chamber. (a). Q-Lab UV weathering chamber (b) glass beakers in the chamber. (c) closeup look at the beakers containing particles. (d). UVA340nm irradiance distribution.

**Weathering process:** The chamber was maintained at an average room temperature. Water levels were consistently replenished to sustain a volume of 300 mL throughout the experiment. After UV weathering, the particles were stored at 4°C for further experiments.

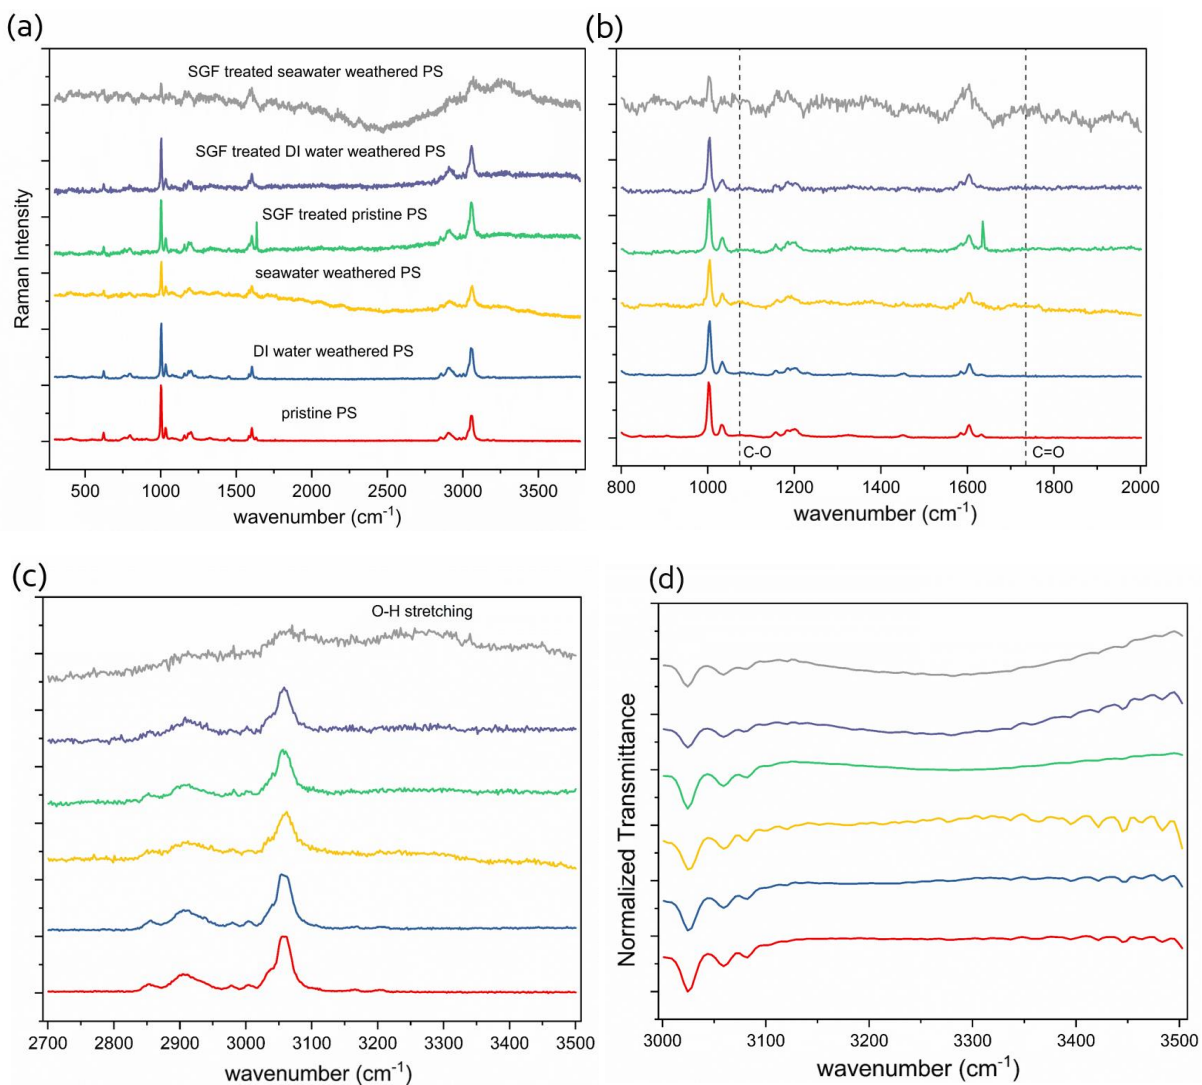

**Fig S2. A.** Raman spectrum of non-treated particles and SGF-treated particles. (a) Full Raman spectrum, (b) Spectrum for wavenumber range 800 – 2000 cm<sup>-1</sup>, (c) spectrum for wavenumber range 2700- 3500 cm<sup>-1</sup>; (d). FTIR spectrum for range 3000 cm<sup>-1</sup> – 3500 cm<sup>-1</sup>.

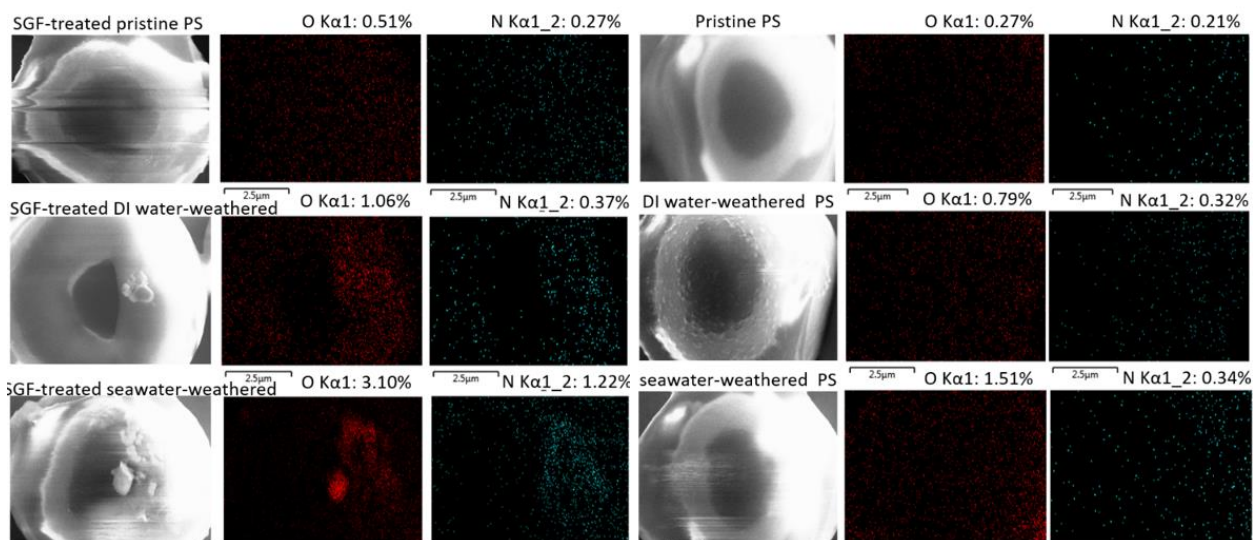

**Fig. S3.** EDS images showing nitrogen and oxygen atomic % and distribution on particle surfaces.

(a)

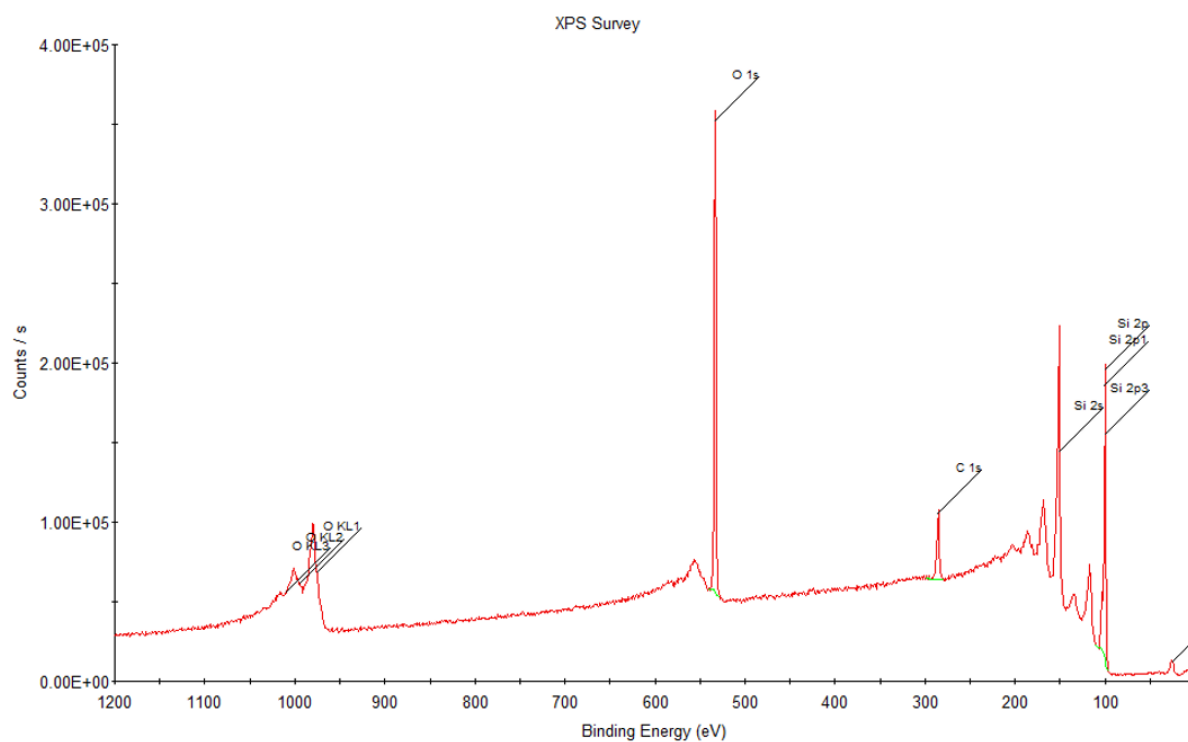

(b)

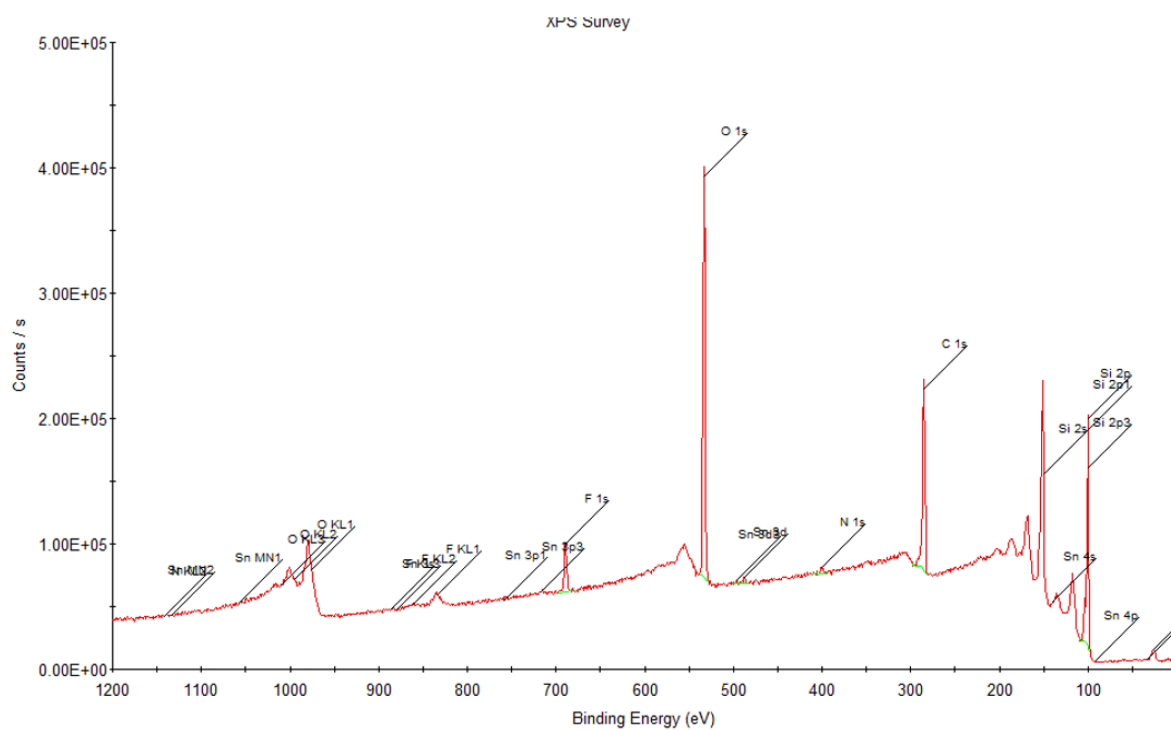

(c)

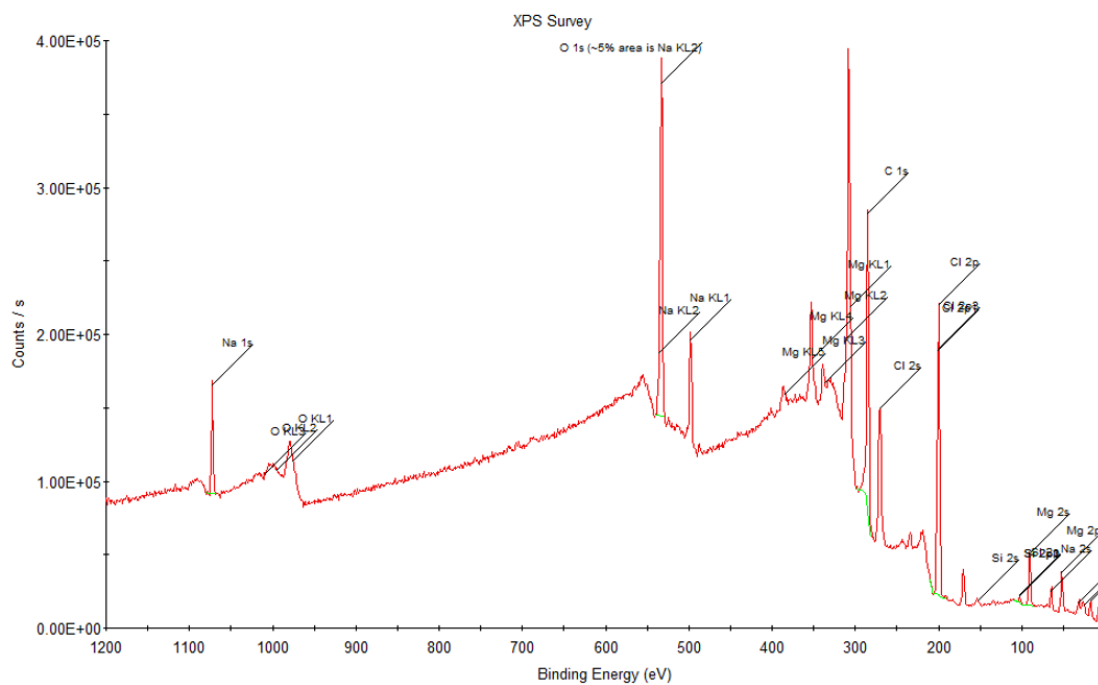

(d)

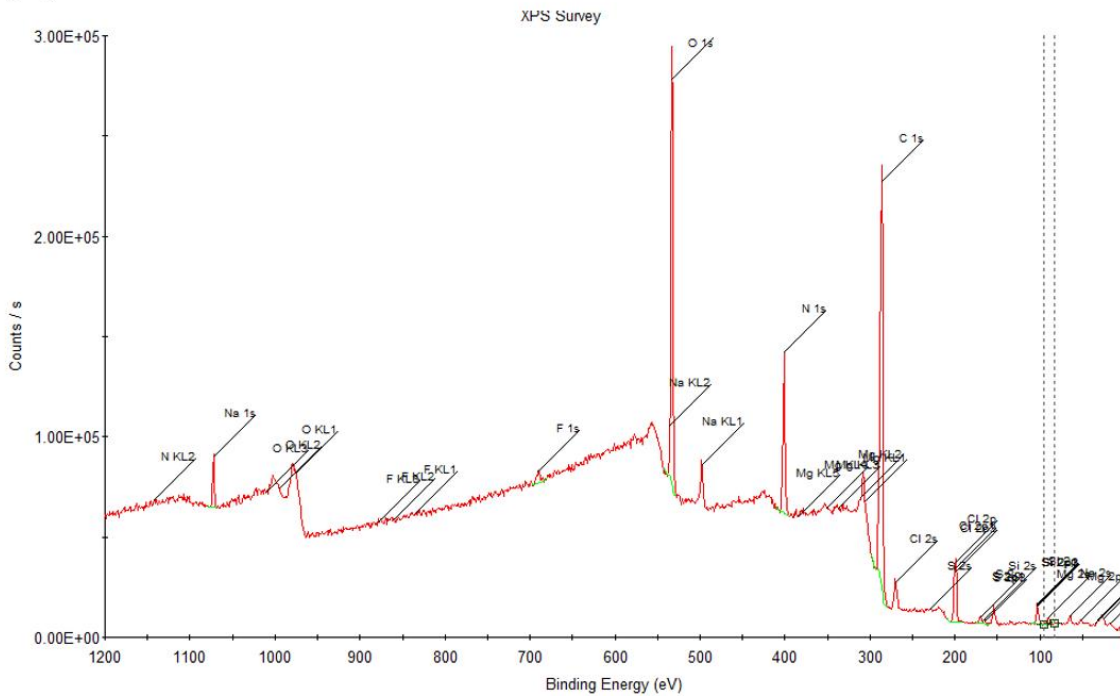

(e)

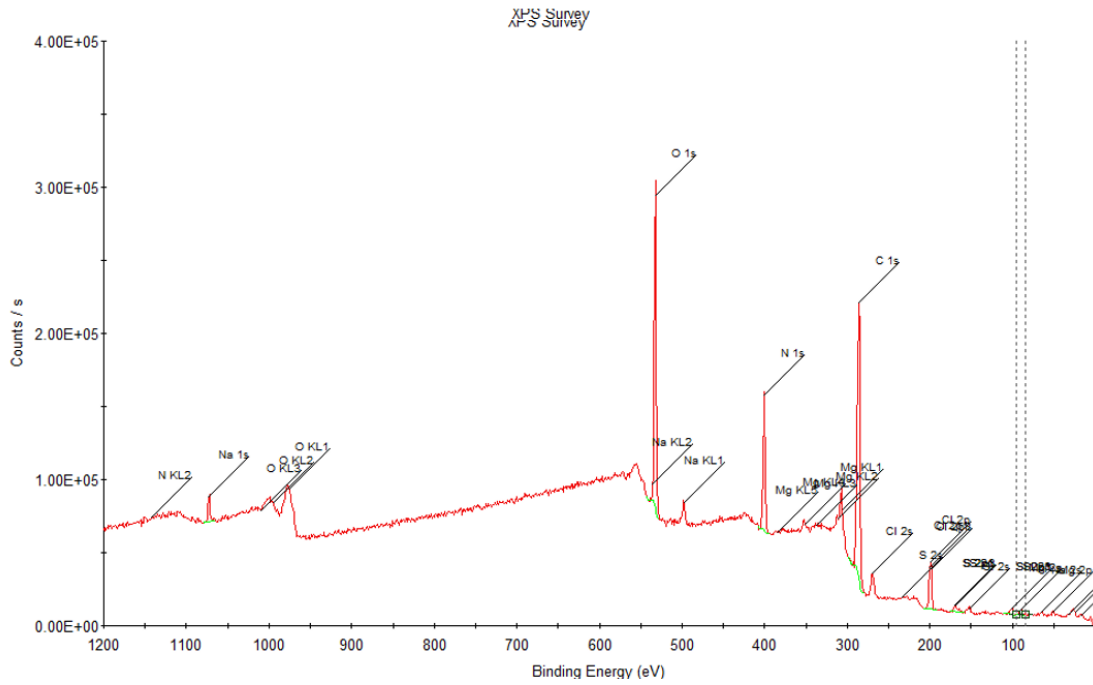

(f)

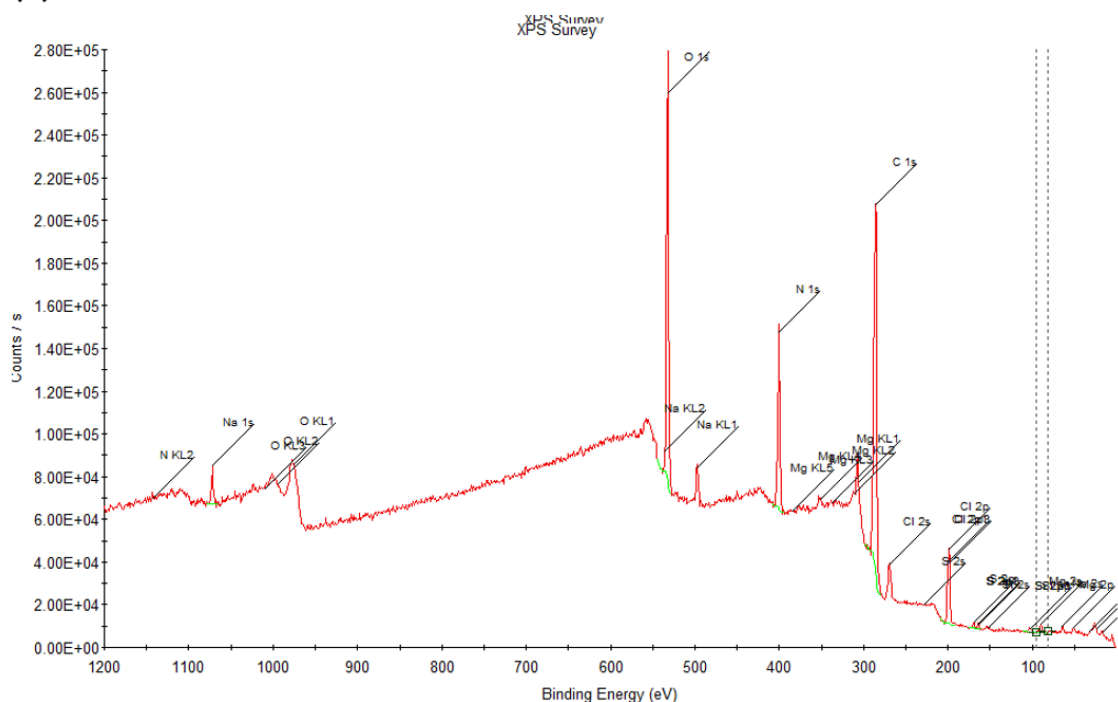

**Fig. S4.** XPS survey for all particles. (a) non-treated pristine particles, (b) non-treated DI water weathered particles, (c) non-treated seawater weathered particles, (d) SGF-treated pristine particles, (e) SGF-treated DI water weathered particles, (f) SGF-treated seawater weathered particles.

**Table S1.** XPS survey element composition of non-treated pristine polystyrene particles

| Name | Peak BE | Height CPS | FWHM eV | Area (P) CPS.eV | Atomic % | Q |
|------|---------|------------|---------|-----------------|----------|---|
| O1s  | 533.12  | 263209.81  | 2.77    | 815552.19       | 34.19    | 1 |
| Si2p | 100.11  | 149157.64  | 2.44    | 511536.78       | 51.52    | 1 |
| C1s  | 285.31  | 38895.79   | 2.91    | 141098.44       | 14.29    | 1 |

**Table S2.** XPS survey element composition of non-treated DI water weathered pristine polystyrene particles

| Name  | Peak BE | Height CPS | FWHM eV | Area (P) CPS.eV | Atomic % | Q |
|-------|---------|------------|---------|-----------------|----------|---|
| Si 2p | 98.37   | 136135     | 2.71    | 491663.6        | 35.5     | 1 |
| C 1s  | 283.85  | 123399.5   | 3.31    | 470106.9        | 34.14    | 1 |
| N 1s  | 398.77  | 4098.5     | 3.46    | 16159.31        | 0.76     | 1 |
| Sn 3d | 486.08  | 4210.58    | 2.67    | 22061.1         | 0.05     | 1 |
| O 1s  | 531.28  | 265596.9   | 3       | 871634.4        | 26.19    | 1 |
| F 1s  | 687.98  | 36409.93   | 3.3     | 140051.6        | 3.37     | 1 |

**Table S3.** XPS survey element composition of non-treated seawater-weathered polystyrene particles



| Name                      | Peak BE | Height CPS | FWHM eV | Area (P) CPS.eV | Atomic % | Q |
|---------------------------|---------|------------|---------|-----------------|----------|---|
| Mg 2s                     | 90.81   | 33037.54   | 2.91    | 109383.5        | 9.57     | 1 |
| Si 2p                     | 102.13  | 4179.12    | 2.33    | 13598.31        | 1.01     | 1 |
| Cl 2p                     | 200.06  | 193284.4   | 3.26    | 672544.7        | 17.31    | 1 |
| C 1s                      | 285.11  | 178283.3   | 2.83    | 607996.9        | 45.22    | 1 |
| O 1s (~5% area is Na KL2) | 533.02  | 224822.8   | 3.01    | 778195.4        | 23.96    | 1 |
| Na 1s                     | 1072.35 | 66622.75   | 1.6     | 191541.5        | 2.93     | 1 |

**Table S4.** XPS survey element composition of SGF-treated pristine polystyrene particles

| Name  | Peak BE | Height CPS | FWHM eV | Area (P) CPS.eV | Atomic % | Q |
|-------|---------|------------|---------|-----------------|----------|---|
| Mg 2s | 90.17   | 3074.12    | 2.73    | 10390.95        | 0.91     | 1 |
| Si 2p | 103.04  | 9175.44    | 3.01    | 33083.38        | 2.44     | 1 |
| S 2p  | 169.98  | 2765.52    | 2.71    | 16142.58        | 0.59     | 1 |
| Cl 2p | 199.42  | 29845.84   | 3.44    | 109531.2        | 2.81     | 1 |
| C 1s  | 286.27  | 199528.9   | 3.59    | 810859.3        | 60.13    | 1 |
| N 1s  | 401.07  | 72104.07   | 2.85    | 227896.6        | 10.89    | 1 |
| O 1s  | 532.96  | 204820     | 3       | 667104.8        | 20.46    | 1 |
| F 1s  | 690.23  | 5729.16    | 3.99    | 31091.1         | 0.76     | 1 |
| Na 1s | 1072.23 | 22805.54   | 2.62    | 66077.25        | 1.01     | 1 |

**Table S5.** XPS survey element composition of SGF-treated DI water-weathered polystyrene particles

| Name  | Peak BE | Height CPS | FWHM eV | Area (P) CPS.eV | Atomic % | Q |
|-------|---------|------------|---------|-----------------|----------|---|
| Mg 2s | 90      | 3586.04    | 3.05    | 11516.91        | 1.03     | 1 |
| Si 2p | 101.19  | 4014.64    | 3.01    | 14896.36        | 1.13     | 1 |
| S 2p  | 169.28  | 4180.1     | 2.04    | 20498.76        | 0.77     | 1 |
| Cl 2p | 199.12  | 31759.44   | 3.54    | 116592.2        | 3.07     | 1 |
| C 1s  | 286.09  | 181920.3   | 3.9     | 769513.5        | 58.7     | 1 |
| N 1s  | 400.47  | 86949.6    | 1.68    | 277478.1        | 13.63    | 1 |
| O 1s  | 532.28  | 203520.3   | 2.97    | 656197.6        | 20.7     | 1 |
| Na 1s | 1072.5  | 15981.03   | 1.82    | 61245.96        | 0.96     | 1 |

**Table S6.** XPS survey element composition of SGF-treated seawater-weathered polystyrene particle

| Name  | Peak BE | Height CPS | FWHM eV | Area (P) CPS.eV | Atomic % | Q |
|-------|---------|------------|---------|-----------------|----------|---|
| Mg 2s | 90.05   | 2954.64    | 2.01    | 8634.46         | 0.85     | 1 |
| Si 2p | 102.18  | 1737.9     | 5.54    | 9193.3          | 0.76     | 1 |
| S 2p  | 169.16  | 2765.53    | 2.68    | 14881.47        | 0.61     | 1 |
| Cl 2p | 199     | 33217.55   | 3.3     | 122511.2        | 3.53     | 1 |
| C 1s  | 286.03  | 169365.6   | 3.85    | 714604          | 59.65    | 1 |
| N 1s  | 400.4   | 77682.12   | 1.81    | 247347.7        | 13.3     | 1 |
| O 1s  | 532.27  | 182613.3   | 2.98    | 590586.4        | 20.38    | 1 |
| Na 1s | 1072.05 | 15088.74   | 2.54    | 53071.46        | 0.91     | 1 |

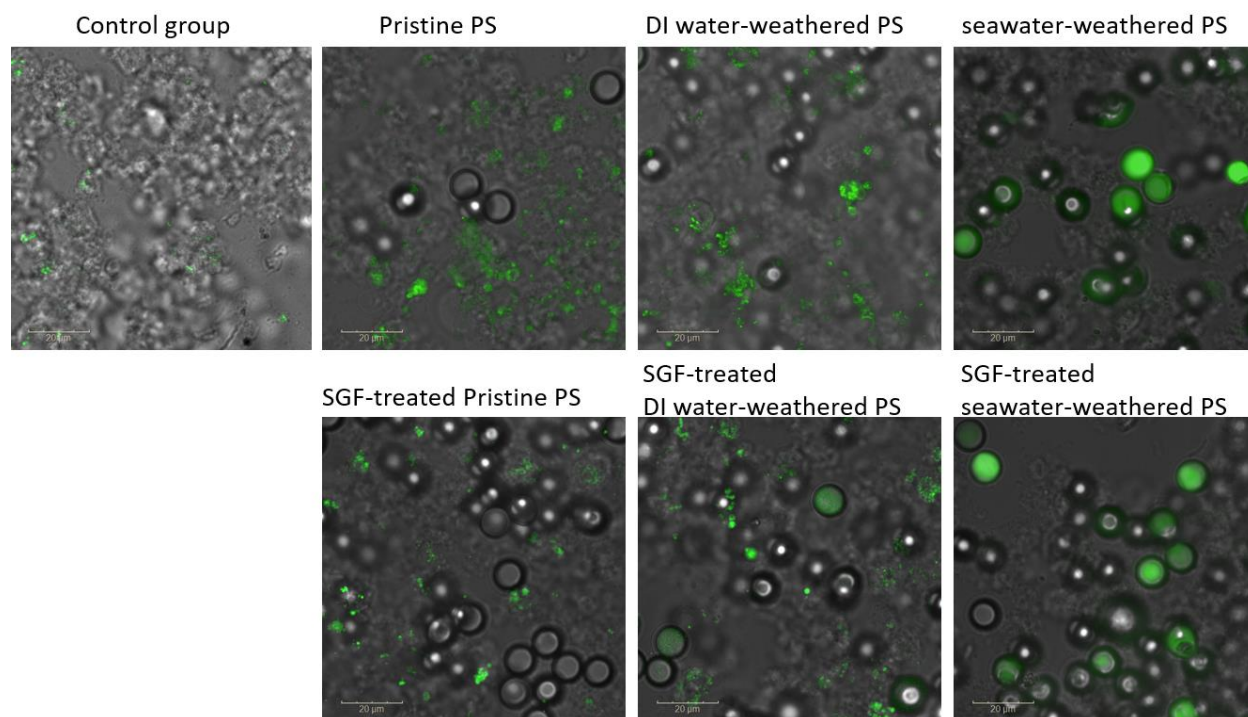

**Fig. S5** ROS production of RAW264.7. Brightfield and FITC channel. Images showing weathered particles, and SGF-treated weathered particles are conjugated with Alexa Fluor 488.

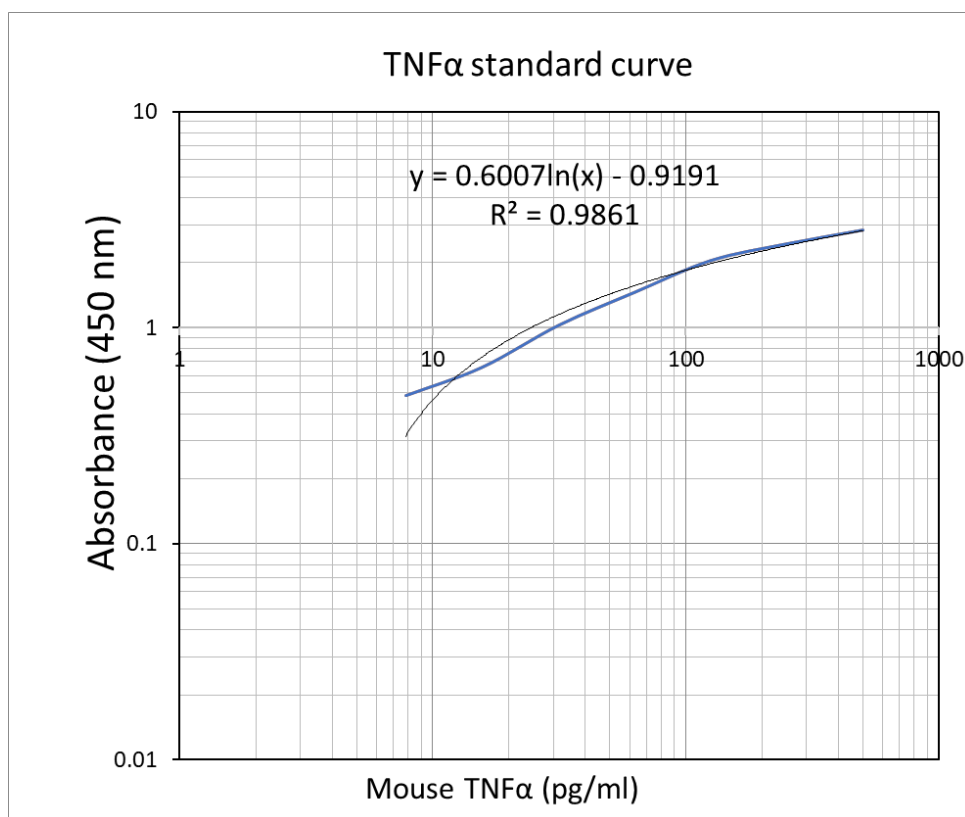

**Fig. S6** TNF $\alpha$  standard curve

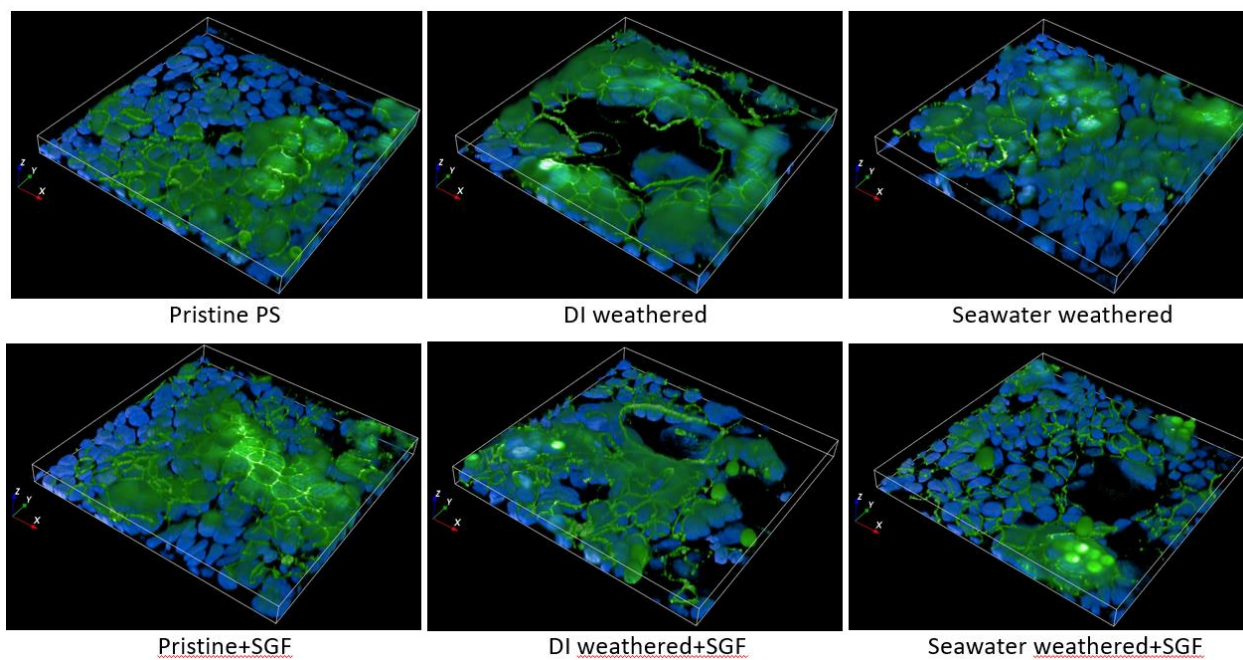

**Fig. S7.** Z-stack 3D images of particles in Caco-2 cells
